# Supplementary material for: Irreversible destruction of amyloid fibril plaques by conjugated polymer based fluorogenic nanogrenades
Source: Royal Society of Chemistry journal article supplement (doi:10.1039/c6tb01351a), 2016-01-01
Supplement: c6tb01351a1.pdf [file c6tb01351a1.pdf]

## **Supporting Information for**

### **Irreversible destruction of amyloid fibril plaques by conjugated polymer based fluorogenic nanogrenades**

Wei-Tao Dou,<sup>1</sup> Ying Lv,<sup>2</sup> Chunyan Tan,<sup>2,\*</sup> Guo-Rong Chen,<sup>1</sup> and Xiao-Peng He<sup>1,\*</sup>

<sup>1</sup>*Key Laboratory for Advanced Materials & Institute of Fine Chemicals, East China University of Science and Technology, 130 Meilong Rd., Shanghai 200237, PR China, E-mail: [xphe@ecust.edu.cn](mailto:xphe@ecust.edu.cn) (Xiao-Peng He)*

<sup>2</sup>*The Ministry-Province Jointly Constructed Base for State Key Lab-Shenzhen Key Laboratory of Chemical Biology, the Graduate School at Shenzhen, Tsinghua University, Shenzhen 518055, PR China, E-mail: [tancy@sz.tsinghua.edu.cn](mailto:tancy@sz.tsinghua.edu.cn) (Chunyan Tan)*

#### **Contents List:**

- S1. Additional Figures
- S2. Experimental Section
- S3. Additional References

## S1. Additional figures

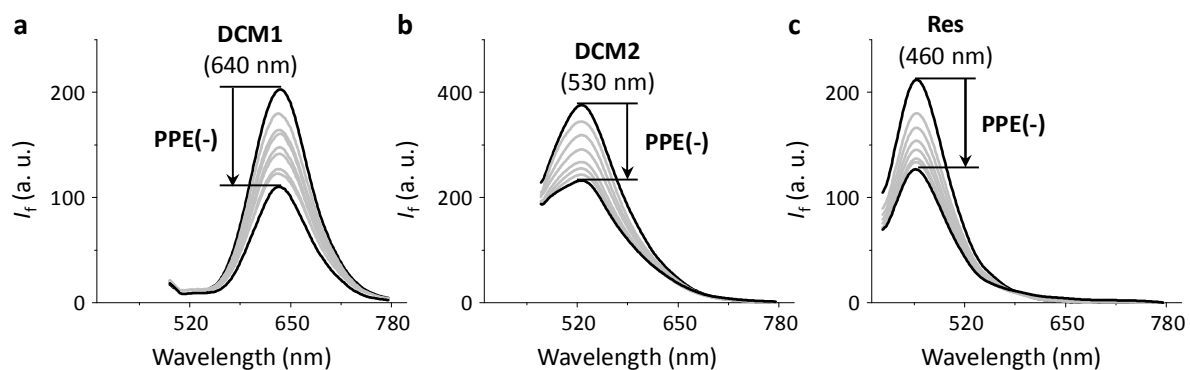

**Figure S1.** Fluorescence titration of different fluorescent dyes (2  $\mu$ M for **DCM1** and 5  $\mu$ M for **DCM2** and **Res**) with increasing **PPE(-)** (0-45  $\mu$ M for **DCM1** and 0-70  $\mu$ M for **DCM2** and **Res**) in Tris-HCl buffer (0.01 M, pH 7.4). Excitation wavelengths for **DCM1** ( $\lambda_{em/max}$  = 640 nm), **DCM2** ( $\lambda_{em/max}$  = 530 nm) and **Res** ( $\lambda_{em/max}$  = 460 nm) are 460, 420 and 365 nm, respectively.

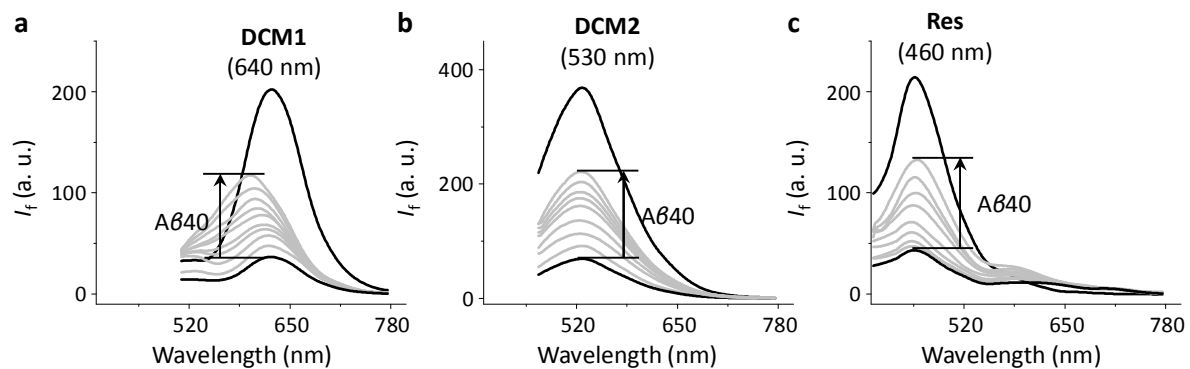

**Figure S2.** Fluorescence titration of different nanogrenades (45  $\mu$ M **PPE(+)** with 2  $\mu$ M **DCM1** and 70  $\mu$ M **PPE(+)** with 5  $\mu$ M **DCM2/Res**) in Tris-HCl buffer (0.01 M, pH 7.4) with increasing monomeric A $\beta$ 40 (0-50  $\mu$ M for **DCM1**, 0-50  $\mu$ M for **DCM2** and 0-45  $\mu$ M for **Res**). Excitation wavelengths for **DCM1** ( $\lambda_{em/max}$  = 640 nm), **DCM2** ( $\lambda_{em/max}$  = 530 nm) and **Res** ( $\lambda_{em/max}$  = 460 nm) are 460, 420 and 365 nm, respectively.

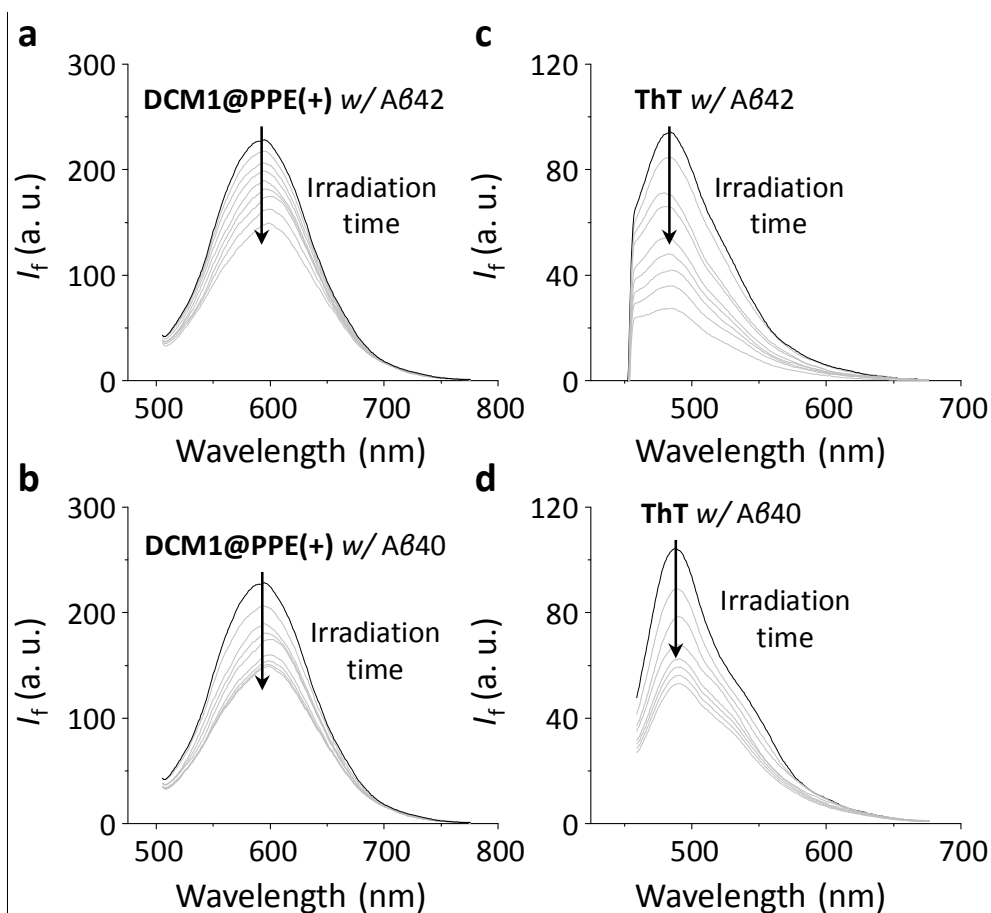

**Figure S3.** Fluorescence titration of **DCM1@PPE(+)** (2/50  $\mu$ M) in Tris-HCl buffer (0.01 M, pH 7.4) with (w/) (a) A $\beta$ 42 fibril plaques (50  $\mu$ M) and (b) A $\beta$ 40 fibril plaques (50  $\mu$ M) upon white-light irradiation (40 mW cm<sup>-2</sup>) with time (0-25 min). Fluorescence titration of Thioflavin T (**ThT**, 2  $\mu$ M) in Tris-HCl buffer (0.01 M, pH 7.4) with (c) A $\beta$ 42 fibril plaques (50  $\mu$ M) and (d) A $\beta$ 40 fibril plaques (50  $\mu$ M) upon white-light irradiation with time (0-25 min). Excitation wavelength = 460 and 425 nm for **DCM1** and **ThT**, respectively.

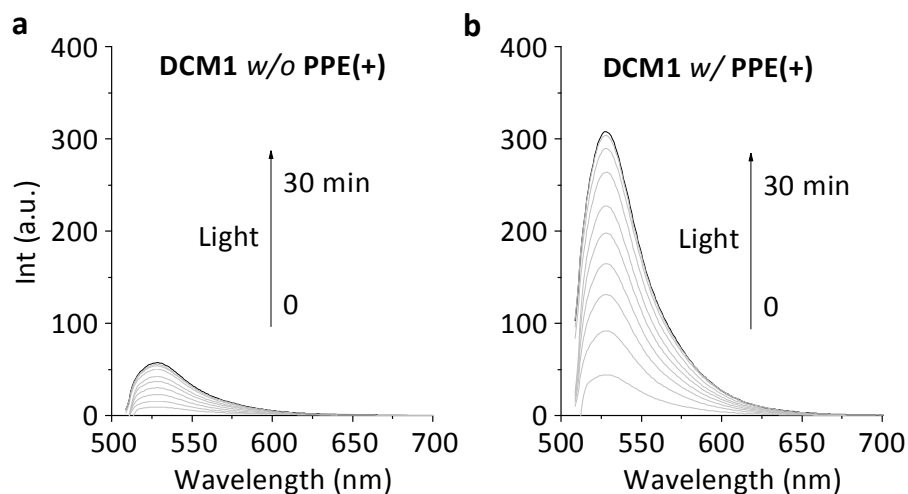

**Figure S4.** Fluorescence titration of dihydrorhodamine-123 (**DHR123**, a trapper of reactive oxygen species, 2  $\mu\text{M}$ ) in Tris-HCl buffer (0.01 M, pH 7.4) in the presence of **DCM1** (2  $\mu\text{M}$ ) without (*w/o*) (a) and with (*w/*) (b) **PPE(+)** (50  $\mu\text{M}$ ) upon white-light irradiation (40 mW cm<sup>-2</sup>) with time (0-30 min). Excitation wavelength = 485 nm.

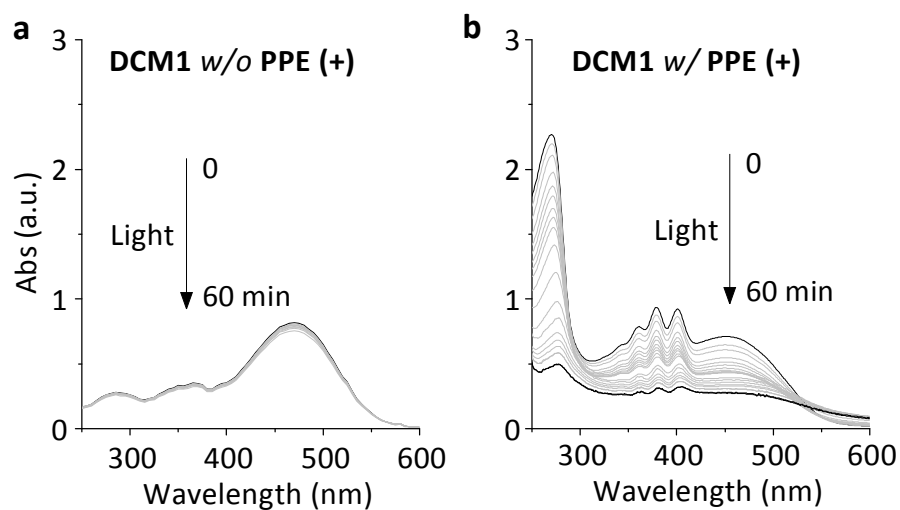

**Figure S5.** UV absorbance titration of 9,10-diphenylanthracene (**DPA**, a trapper of singlet oxygen, 20  $\mu\text{M}$ ) in Tris-HCl buffer (0.01 M, pH 7.4) in the presence of **DCM1** (2  $\mu\text{M}$ ) without (*w/o*) (a) and with (*w/*) (b) **PPE(+)** (50  $\mu\text{M}$ ) upon white-light irradiation (40  $\text{mW cm}^{-2}$ ) with time (0-60 min).

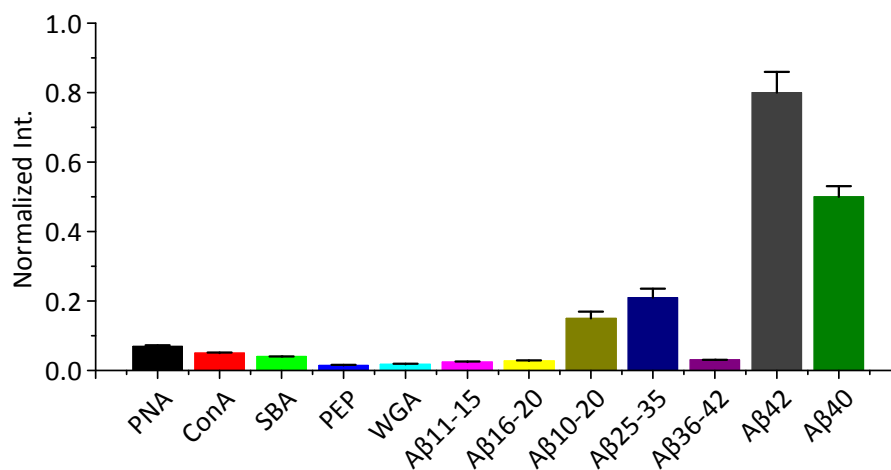

**Figure S6.** Fluorescence response of **DCM1@PPE(+)** (2/50  $\mu$ M) in Tris-HCl buffer (0.01 M, pH 7.4) in the presence of a range of proteins and peptides (50  $\mu$ M). Excitation wavelength = 460 nm. Abbreviations: peanut agglutinin (PNA), concanavalin A (Con A), soybean agglutinin (SBA), pepsin (PEP), wheat germ agglutinin (WGA), and the peptides are shortened A $\beta$  monomers. Normalized Int. is the ratio of the fluorescence intensity of **DCM1** alone to that of **DCM1@PPE(+)** in the presence of an analyte.

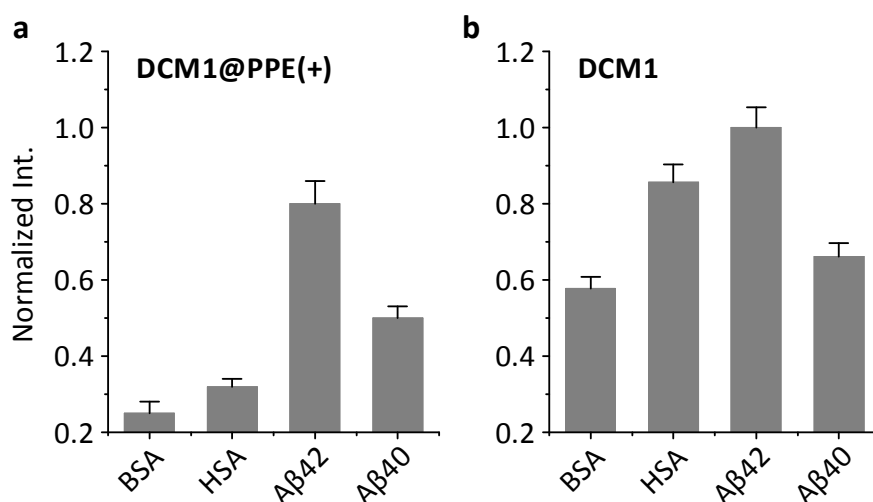

**Figure S7.** Fluorescence response of (a) **DCM1@PPE(+)** (2/50  $\mu$ M) and (b) **DCM1** alone (2  $\mu$ M) in Tris-HCl buffer (0.01 M, pH 7.4) in the presence of different proteins and peptides (50  $\mu$ M). Excitation wavelength = 460 nm. Abbreviations: bovine serum albumin (BSA) and human serum albumin (HSA). For Fig. 7a, normalized Int. is the ratio of the fluorescence intensity of **DCM1** alone to that of **DCM1@PPE(+)** in the presence of an analyte. For Fig. 7b, normalized Int. is the ratio of the fluorescence intensity of **DCM1** with A $\beta$ 42 to that of **DCM1** with an analyte.

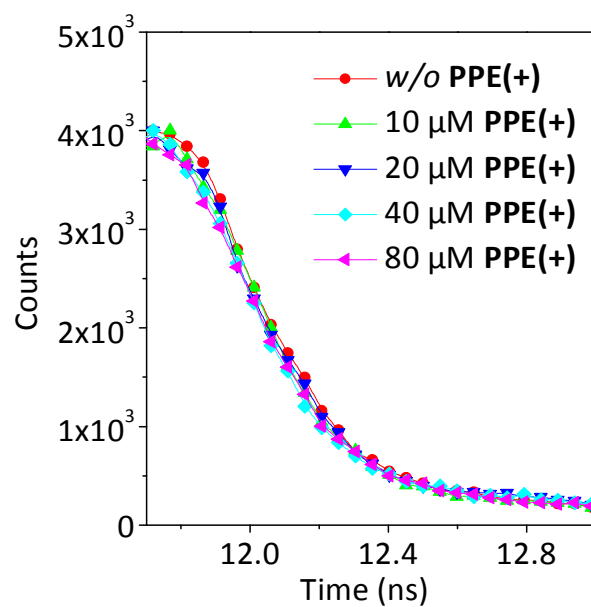

**Figure S8.** Time-resolved fluorescence decay of **DCM1** (10  $\mu\text{M}$ ) in Tris-HCl buffer (0.01 M, pH 7.4) without (*w/o*) and with increasing **PPE(+)**.

## S2. Experimental Section

**General.** All purchased chemicals and reagents are of analytical grade. Resveratrol was purchased from J&K Chemical. Amyloid  $\beta$  peptides were purchased from GL Biochem (shanghai) Ltd.  $^1\text{H}$  NMR spectra were recorded on a Bruker AM 400MHz spectrometer with tetramethylsilane (TMS) as internal reference. Absorption spectra were measured on a Varian Cary 500 UV-Vis spectrophotometer. High Performance Liquid Chromatography (HPLC) was performed on a Shimadzu Prominence Series equipment. Transmission electron microscopy (TEM) images were obtained on a JEOL 100CX transmission electron microscope operating at an accelerating bias voltage of 100 kV. Scanning electron microscopy (SEM) images were obtained on an S-3400N (HITACHI, Japan) scanning electron microscope with an accelerating voltage of 15 kV. Atomic force microscopy (AFM) images were obtained with Veeco/DI (USA). Dynamic light scattering (DLS) was carried out on a Horiba LB-550 Dynamic Light Scattering Nano-Analyzer.

### Characterization of Compounds (DCM1<sup>1</sup> and DCM2<sup>2</sup> are known compounds).

**DCM1.**  $^1\text{H}$  NMR (400 MHz,  $\text{CDCl}_3$ ):  $\delta$  7.41 (m, 3H), 6.84 (d,  $J = 8.1$  Hz, 2H), 6.60 (d,  $J = 2.0$  Hz, 1H), 6.53–6.45 (m, 2H), 3.88 (t,  $J = 5.6$  Hz, 2H), 3.60 (t,  $J = 5.6$  Hz, 2H), 3.10 (s, 3H), 2.39 (s, 3H).

HRMS (ESI,  $m/z$ ):  $[\text{M} + \text{H}]^+$  calcd for  $\text{C}_{20}\text{H}_{19}\text{N}_3\text{O}_2$ : 334.1556, found: 334.1525.

HPLC:  $t_R = 3.4$  min over 15 min of  $0.6 \text{ mL min}^{-1}$  mobile phase (100% MeOH), purity 99%.

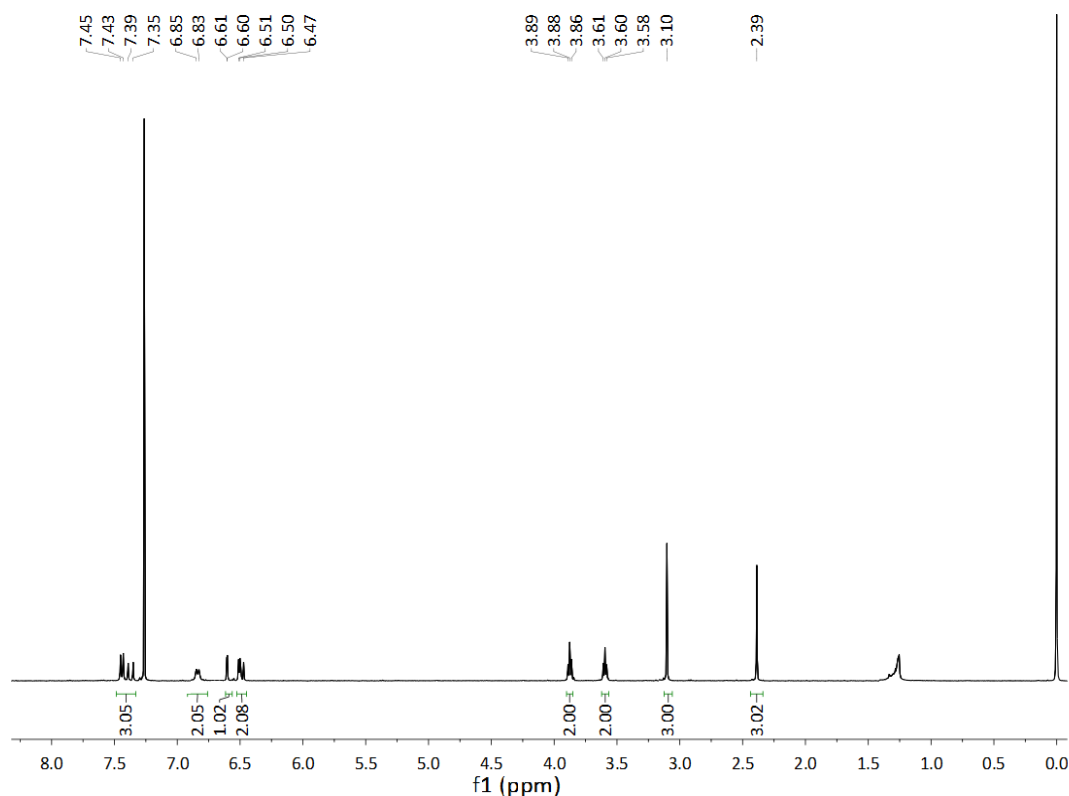

$^1\text{H}$  NMR spectrum of DCM1

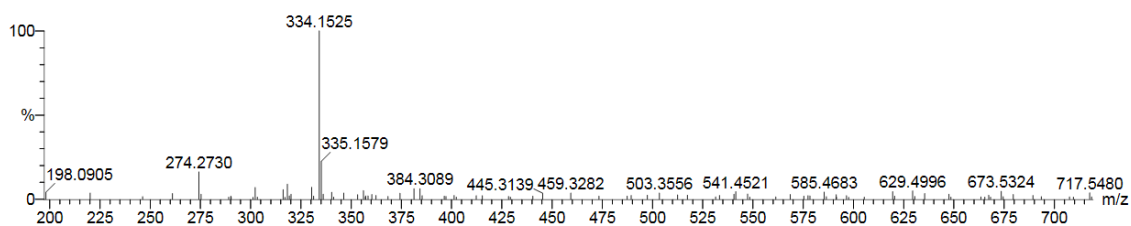

Mass spectrum of **DCM1**

**DCM2.**  $^1\text{H}$  NMR (400 MHz,  $\text{DMSO}-d_6$ ):  $\delta$  10.06 (s, 1H), 7.55 (d,  $J = 8.6$  Hz, 2H), 7.45 (d,  $J = 10.1$  Hz, 1H), 7.11 (d,  $J = 11.2$  Hz, 1H), 6.84 (s, 1H), 6.82–6.79 (m, 2H), 6.66 (d,  $J = 1.3$  Hz, 1H), 2.44 (s, 3H).

HRMS (ESI,  $m/z$ ):  $[\text{M}]$  calcd for  $\text{C}_{17}\text{H}_{11}\text{N}_2\text{O}_2^-$ : 276.0821, found: 275.0819.

HPLC:  $t_R = 2.9$  min over 15 min of  $0.6\text{ mL min}^{-1}$  mobile phase (100% MeOH), purity 99%.

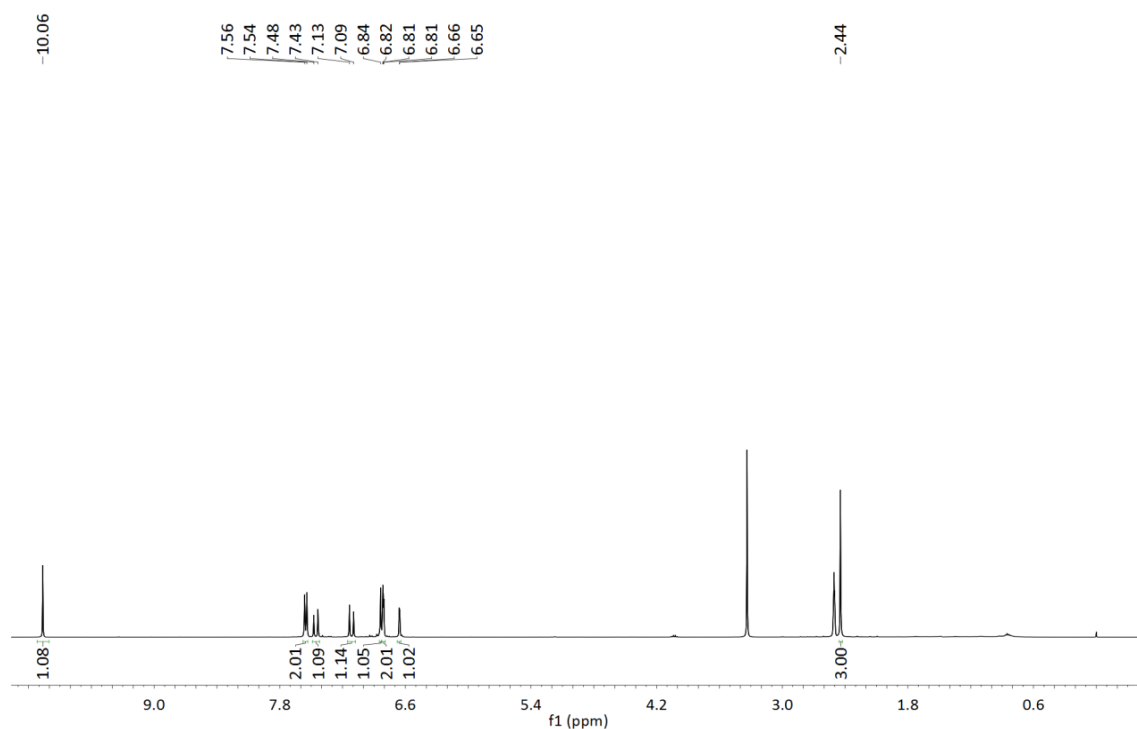

$^1\text{H}$  NMR spectrum of **DCM2**

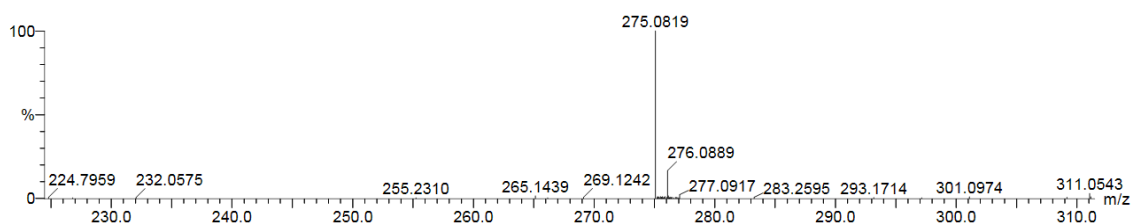

Mass spectrum of **DCM2**

**Resveratrol (Res).**  $^1\text{H}$  NMR (400 MHz, MeOD):  $\delta$  7.37–7.32 (m, 2H), 6.95 (d,  $J$  = 12.3 Hz, 1H), 6.84–6.71 (m, 3H), 6.45 (d,  $J$  = 2.1 Hz, 2H), 6.16 (t,  $J$  = 2.1 Hz, 1H).

HRMS (ESI,  $m/z$ ):  $[\text{M}]$  calcd for  $\text{C}_{14}\text{H}_{11}\text{O}_3^-$ : 227.0708, found: 228.0687.

HPLC ( $t_{\text{R}}$  = 2.6 min over 15 min of 0.6 mL min $^{-1}$  mobile phase (100% MeOH), purity 99%.

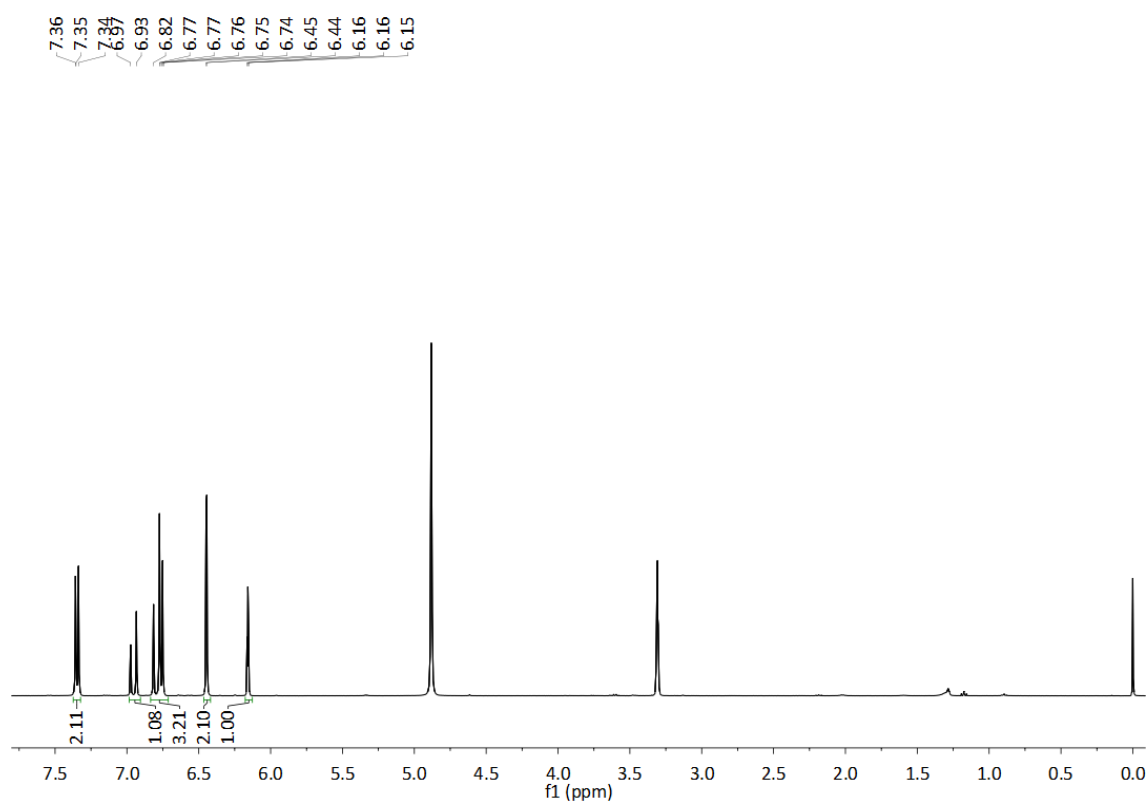

$^1\text{H}$  NMR spectrum of **Res**

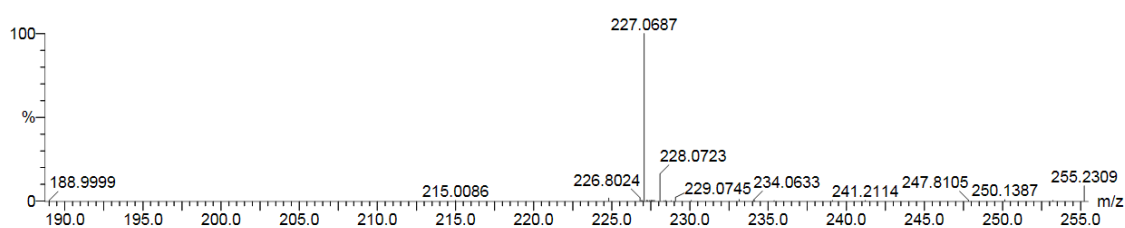

Mass spectrum of **Res**

**Fluorescence Spectroscopy.** In a typical fluorescence quenching assay, a fluorescent dye was incubated with **PPE** of different concentrations in Tris-HCl (0.01 M, pH 7.4) for 30 s, and then the fluorescence was measured on a Varian Cary Eclipse fluorescence spectrophotometer with excitation of 460, 420 and 365 nm for **DCM1**, **DCM2** and **Res**, respectively. In a typical fluorescence recovery assay,  $\text{A}\beta$  of different concentrations were added to the mixture of fluorescent dye and **PPE**. Then, the resulting mixture was incubated at 25 °C for 10 min.

Then, the fluorescence was measured at room temperature with excitation of 460, 420 and 365 nm for **DCM1**, **DCM2** and **Res**, respectively.

**Determination of Reactive Oxygen Species (ROS).** In a typical ROS assay, **PPE(+)** was dropped into Tris-HCl buffer (0.01 M, pH 7.4), and then the mixture was incubated with protoporphyrin IX (**PpIX**) and dihydrorhodamine-123 (**DHR123**) without light for 30 minutes. Then the fluorescence of **DHR123** was measured on a Varian Cary Eclipse fluorescence spectrophotometer upon white light (40 mV cm<sup>-2</sup>) irradiation (0-25min) with an excitation of 485 nm.

### **S3. Additional References**

1. Z. Guo, P. Zhao, W. Zhu, X. Huang, Y. Xie and H. Tian, *J. Phys. Chem. C*, 2008, **112**, 7047-7053.
2. Y. Cui, J. Yu, J. Gao, Z. Wang and G. Qian, *J. Sol-Gel Sci. Technol.*, 2009, **52**, 362-369.
